# Supplementary material for: Short-Term Supplementation of Sodium Nitrate vs. Sodium Chloride Increases Homoarginine Synthesis in Young Men Independent of Exercise
Source: MDPI journal article supplement (doi:10.3390/ijms231810649), 2022-09-13
Supplement: s1 [file s1]

## **Supplement to**

### **Short-term supplementation of sodium nitrate vs sodium chloride (0.14 mmol/kg/d) increases homoarginine synthesis in young men independent of exercise**

Dimitrios Tsikas,<sup>1,a,\*</sup> Norbert Maassen,<sup>2,3,a</sup> Antonie Thorns,<sup>2</sup> Armin Finkel,<sup>2,3</sup> Moritz Lützow,<sup>2</sup> Magdalena Aleksandra Röhrig,<sup>2</sup> Larissa Sarah Blau,<sup>2</sup> Laurianne Dimina,<sup>4</sup> François Mariotti,<sup>4</sup> Bibiana Beckmann<sup>1</sup>, Vladimir Shushakov,<sup>2,3</sup> Mirja Jantz<sup>2,3,b</sup>

<sup>1</sup> *Institute of Toxicology, Core Unit Proteomics, Hannover Medical School, 30623, Hannover, Germany*

<sup>2</sup> *Institute of Sport Medicine, Hannover Medical School, 30623, Hannover, Germany*

<sup>3</sup> *Institute of Sport Science, Leibniz University Hannover, Hannover, Germany*

<sup>4</sup> *Université Paris-Saclay, AgroParisTech, INRAE, UMR PNCA, 75005, Paris, France*

*b Present address: Olympic Training and Service Center of Lower Saxony, Hannover, Germany*

## (A) Results

**Table S1.** Baseline plasma concentrations (in  $\mu\text{M}$ ; K in mM) and nitrate-to-nitrite molar ratio in plasma ( $P_{\text{NO}_x}$ ) of the analytes and equilibrium constants  $K_{\text{harg}}$ ,  $K_{\text{gaa}}$  and  $K_{\text{gaa}}/K_{\text{harg}}$  in the subjects of the study groups. Data are reported as median with interquartile range or as mean with standard deviation. Mann-Whitney test was performed.

| <b>Analytes</b>                       | <b>NaCl group<br/>( <math>n = 8</math> )</b> | <b>NaNO<sub>3</sub> group<br/>( <math>n = 9</math> )</b> | <b>P<br/>value</b> |
|---------------------------------------|----------------------------------------------|----------------------------------------------------------|--------------------|
| Nitrite                               | 2.2 [1.93-2.29]                              | 2.48 [2.11-2.55]                                         | 0.319              |
| Nitrate                               | 46.5 [42.8-55.0]                             | 43.9 [37.6-52.5]                                         | 0.913              |
| Nitrate/Nitrite ( $P_{\text{NO}_x}$ ) | 21.7 [18.5-26.5]                             | 19 [15.7-20.9]                                           | 0.209              |
| Creatinine                            | 92 [84-101]                                  | 87.5 [81.6-96.5]                                         | 0.497              |
| Malondialdehyde                       | 0.37 [0.31-0.42]                             | 0.39 [0.31-0.46]                                         | 0.747              |
| Kalium (mM)                           | 4.15 $\pm$ 0.41                              | 3.92 $\pm$ 0.21                                          | 0.154              |
| Alanine                               | 355 [260-392]                                | 323 [254-379]                                            | 0.518              |
| Threonine                             | 130 [107-162]                                | 112 [105-147]                                            | 0.421              |
| Glycine                               | 213 [176-248]                                | 197 [147-233]                                            | 0.501              |
| Valine                                | 232 [220-286]                                | 253 [218-265]                                            | 0.386              |
| Serine                                | 128 [106-210]                                | 128 [124-139]                                            | 0.562              |
| <b>Sarcosine</b>                      | <b>2.24 [2.0-2.58]</b>                       | <b>1.34 [1.27-1.84]</b>                                  | <b>0.005</b>       |
| Leucine/Isoleucine                    | 181 [160-254]                                | 189 [155-220]                                            | 0.326              |
| Guanidinoacetate                      | 2.29 [1.77-2.92]                             | 2.28 [1.84-4.57]                                         | 0.835              |
| Aspartate/Asparagine                  | 64.9 [56.4-94.0]                             | 59.5 [48-74]                                             | 0.165              |
| Hydroxy-proline                       | 8.88 [5.77-10.9]                             | 8.55 [6.26-10.7]                                         | 0.962              |
| Proline                               | 165 [118-230]                                | 184 [152-204]                                            | 0.878              |
| Methionine                            | 52.6 [44.5-58.5]                             | 47.9 [40.8-55.5]                                         | 0.362              |
| Glutamate/Glutamine                   | 617 [472-651]                                | 581 [449-654]                                            | 0.662              |
| Ornithine/Citrulline                  | 38.4 [34.1-45.8]                             | 42.9 [33.7-47.6]                                         | 0.530              |
| Phenylalanine                         | 55.7 [42.2-69.0]                             | 53.5 [39.4-61.6]                                         | 0.371              |
| Tyrosine                              | 44.5 [43.1-63.9]                             | 43.5 [36.2-52.6]                                         | 0.272              |
| Lysine                                | 149 [130-171]                                | 136 [110-152]                                            | 0.131              |
| Arginine                              | 75.6 [50.4-89.1]                             | 72.5 [55.6-90.2]                                         | 0.946              |
| Homoarginine                          | 1.30 [0.66-1.45]                             | 1.49 [0.88-1.74]                                         | 0.325              |
| Tryptophan                            | 14.2 [10.8-20.4]                             | 14.3 [6.31-19.2]                                         | 0.439              |
| ADMA                                  | 0.380 [0.315-0.534]                          | 0.317 [0.187-0.460]                                      | 0.277              |
| $K_{\text{gaa}}$ ( $\times 1000$ )    | 5.69 [4.41-6.98]                             | 8.76 [5.23-10.2]                                         | 0.179              |
| $K_{\text{harg}}$ ( $\times 1000$ )   | 4.24 [2.74-5.45]                             | 5.67 [4.81-6.68]                                         | 0.132              |
| $K_{\text{gaa}}/K_{\text{harg}}$      | 1.56 [1.01-1.90]                             | 1.30 [1.05-1.87]                                         | 0.818              |

**Table S2.** Number of statistically significant Spearman correlations at baseline between the plasma concentrations of the listed amino acids in the subjects of the two study groups

| Amino acid           | <i>Number of correlations<br/>(<math>P &lt; 0.05</math>)</i> |
|----------------------|--------------------------------------------------------------|
| Alanine              | 11                                                           |
| Threonine            | 14                                                           |
| Glycine              | 12                                                           |
| Valine               | 10                                                           |
| Serine               | 6                                                            |
| Sarcosine            | 0                                                            |
| Leucine/Isoleucine   | 9                                                            |
| Guanidinoacetate     | 3                                                            |
| Aspartate/Asparagine | 10                                                           |
| Hydroxy-proline      | 7                                                            |
| Proline              | 5                                                            |
| Methionine           | 6                                                            |
| Glutamate/Glutamine  | 6                                                            |
| Ornithine/Citrulline | 4                                                            |
| Phenylalanine        | 3                                                            |
| Tyrosine             | 3                                                            |
| Lysine               | 1                                                            |
| Arginine             | 1                                                            |
| Homoarginine         | 0                                                            |
| Tryptophan           | 1                                                            |
| ADMA                 | 0                                                            |

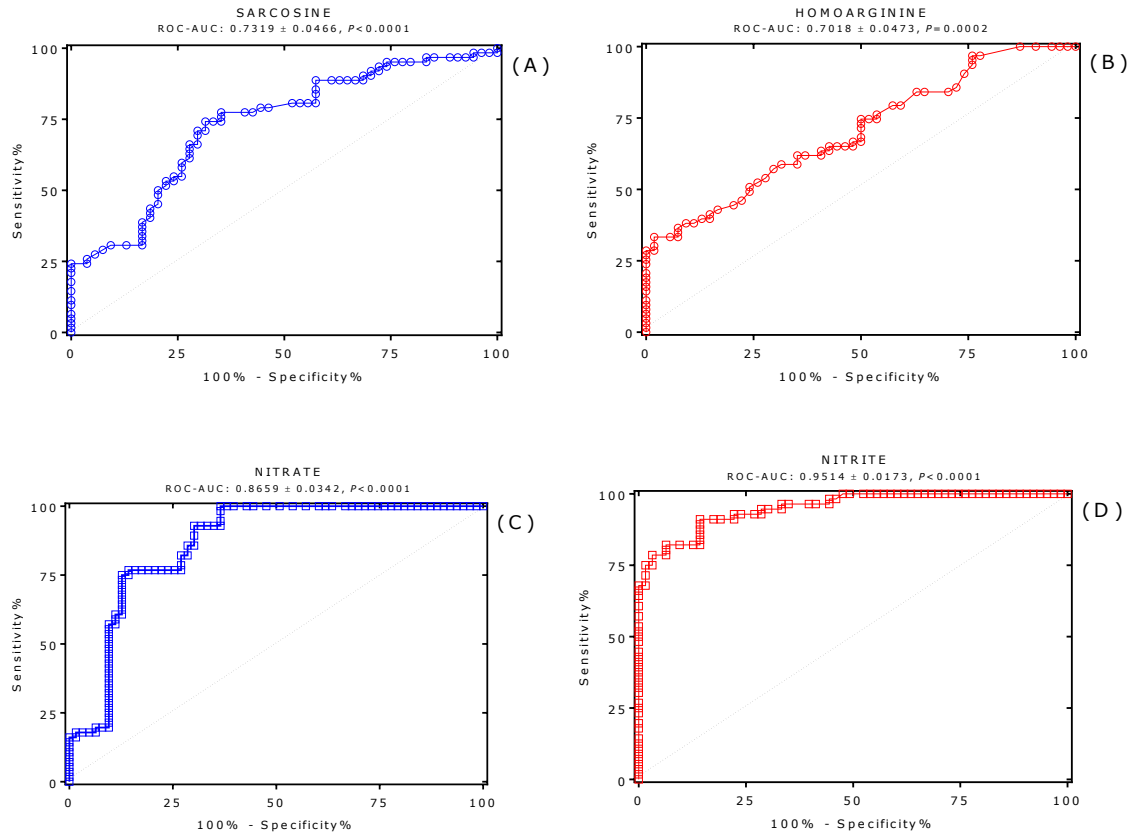

**Figure S1.** Area under the curve (AUC) of receiver operation characteristic (ROC) of (A) plasma sarcosine, (B) plasma homoarginine, (C) plasma nitrate and (D) plasma nitrite after supplementation of NaCl ( $n = 63$ ) or NaNO<sub>3</sub> ( $n = 56$ ). All concentrations measured during the seven exercise steps of all volunteers were included (see Scheme 2).

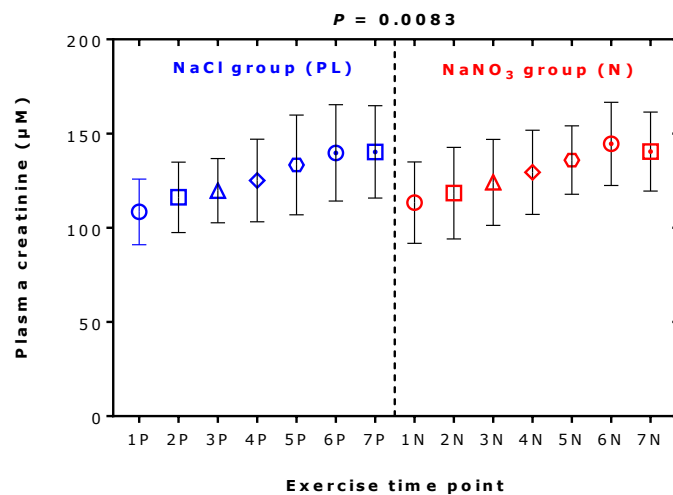

**Figure S2.** Plasma creatinine concentrations in the volunteers of the NaCl group (PL) and the NaNO<sub>3</sub> group (N) at the seven exercise time points after supplementation. Data are shown as mean with standard error of the mean. One-way ANOVA,  $P = 0.0083$ .

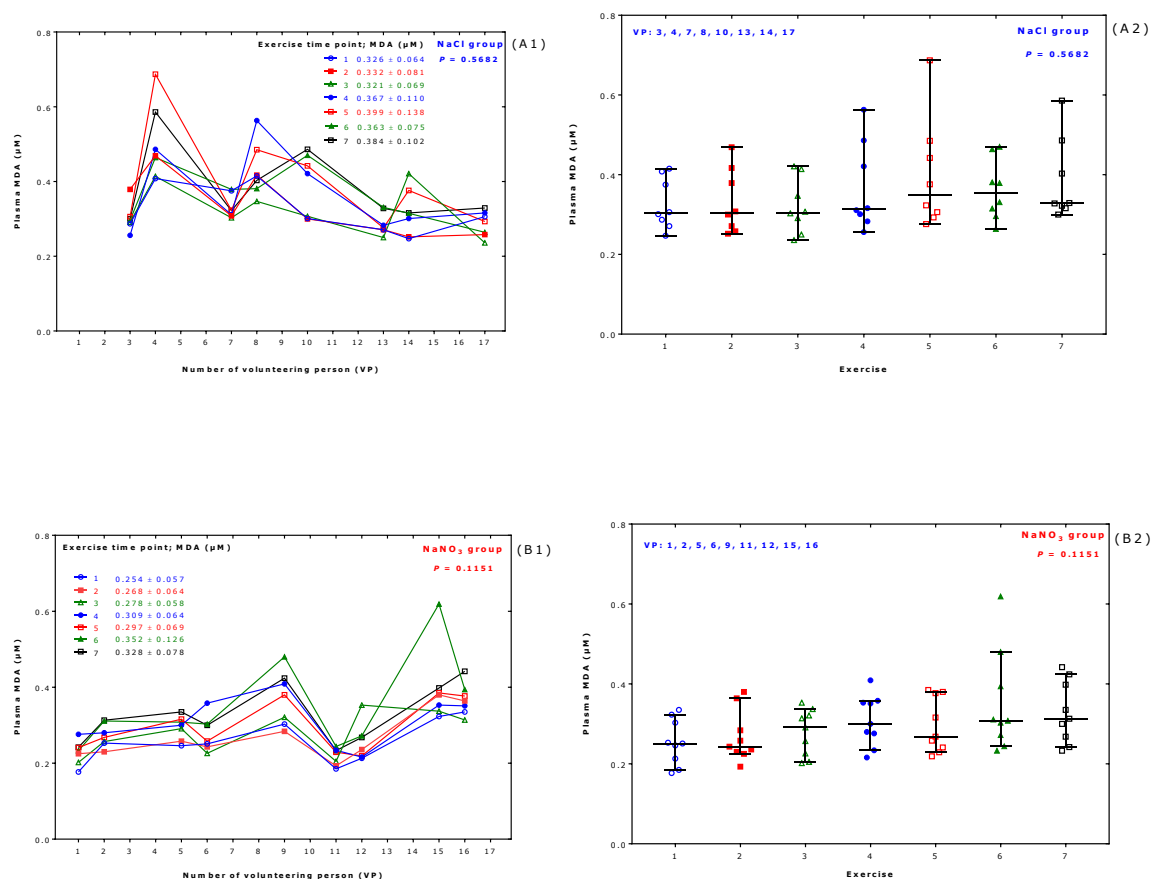

**Figure S3.** Plasma malondialdehyde (MDA) concentrations in the volunteering persons (VP) of the NaCl (A1, A2) and NaNO<sub>3</sub> (B1, B2) groups at the seven individual time points of exercise after supplementation (see Scheme 2). Data in (A2) and (B2) are shown as median with 95% confidence interval.

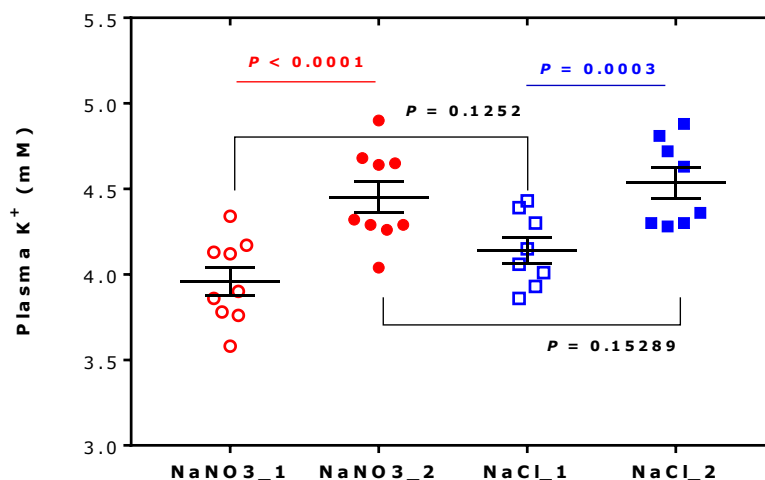

Figure S4. Plasma kalium ( $K^+$ ) concentrations in the volunteering persons (VP) of the NaCl and NaNO<sub>3</sub> groups at exercise 1 and 2 after supplementation. Data are shown as mean with standard error of the mean.

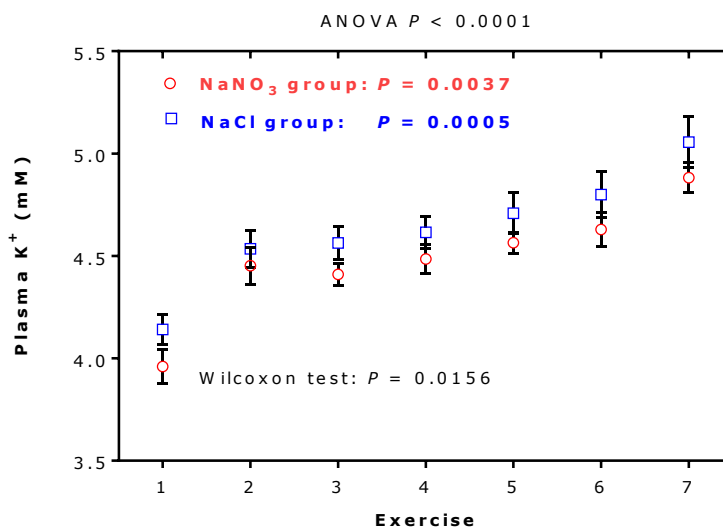

Figure S5. Plasma kalium ( $K^+$ ) concentrations in the volunteering persons of the NaCl and NaNO<sub>3</sub> groups at the seven exercise time points after supplementation of NaCl or NaNO<sub>3</sub> (see Scheme 2). Data are shown as mean with standard error of the mean.

Figure S6 (Panel A to X). Spearman coefficients of correlation between an analyte vs. each of the other analytes in the NaNO<sub>3</sub> and NaCl groups after supplementation. The data of all exercise time points were considered. Only statistically significant correlations ( $r > 0.25$ ,  $P < 0.05$ ) are plotted. The numbers within the pictures give the number of correlations. Each symbol indicates an analyte. Symbols connected by a line indicate the same analyte. GABR, global arginine bioavailability.

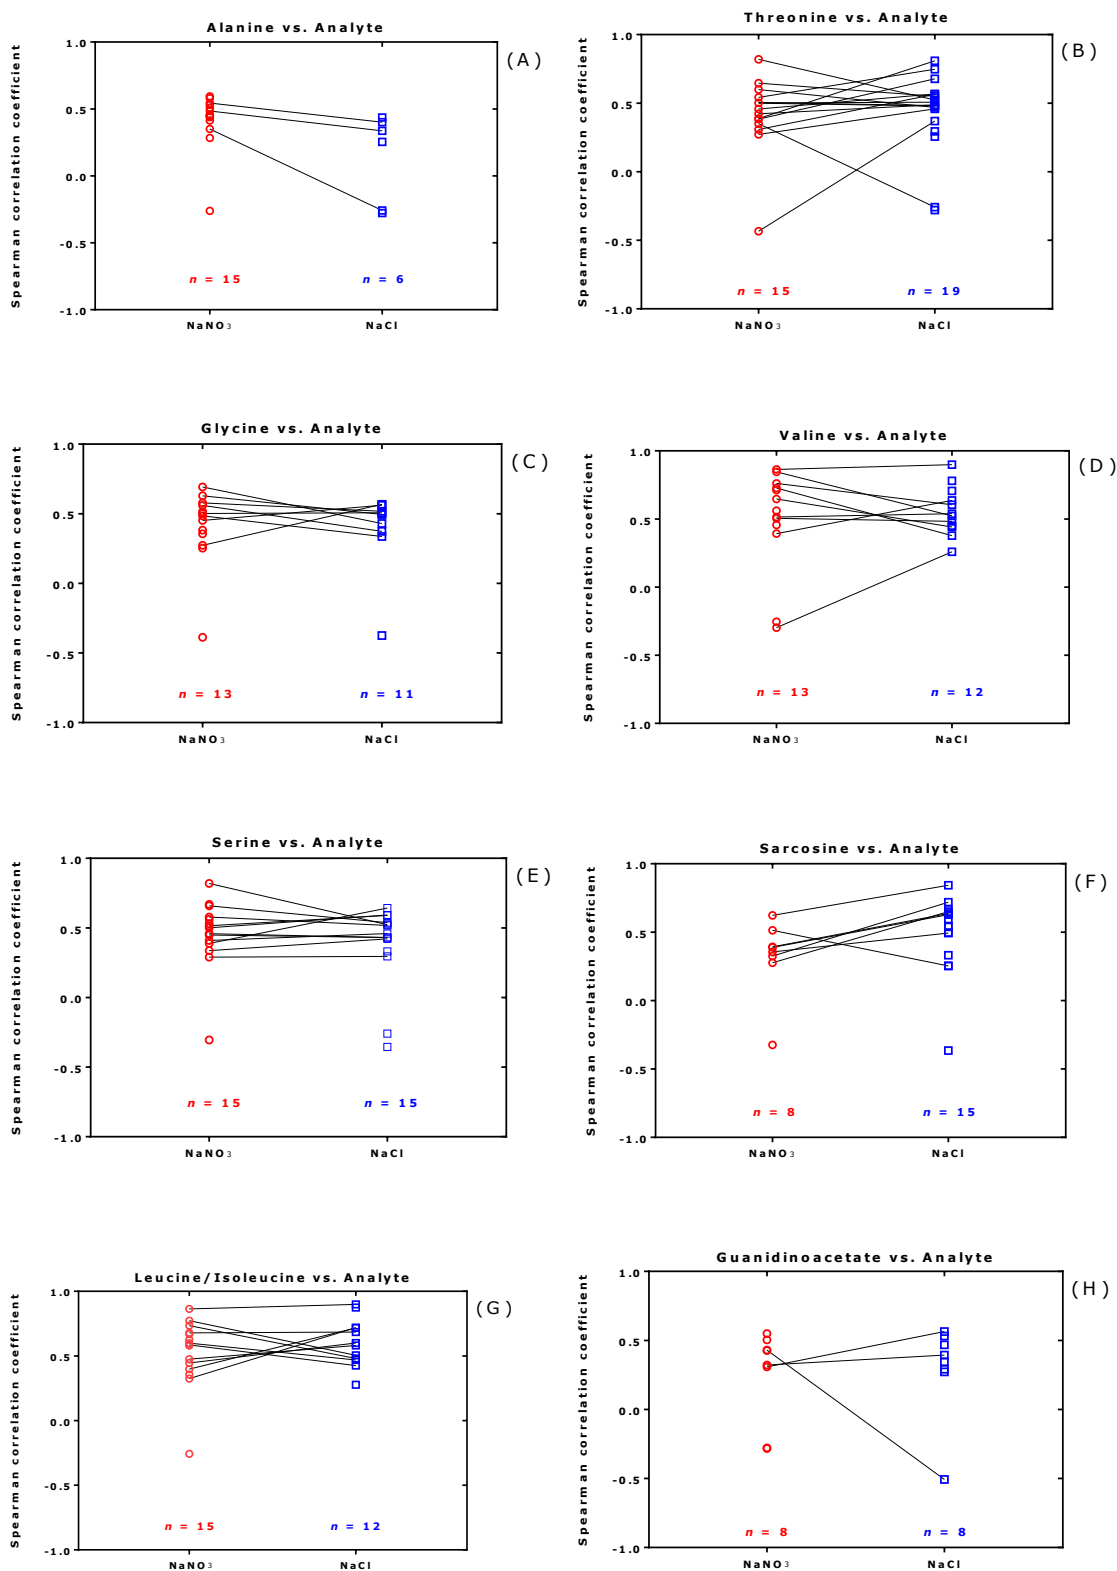

Figure S6 (Panel A to X) continued

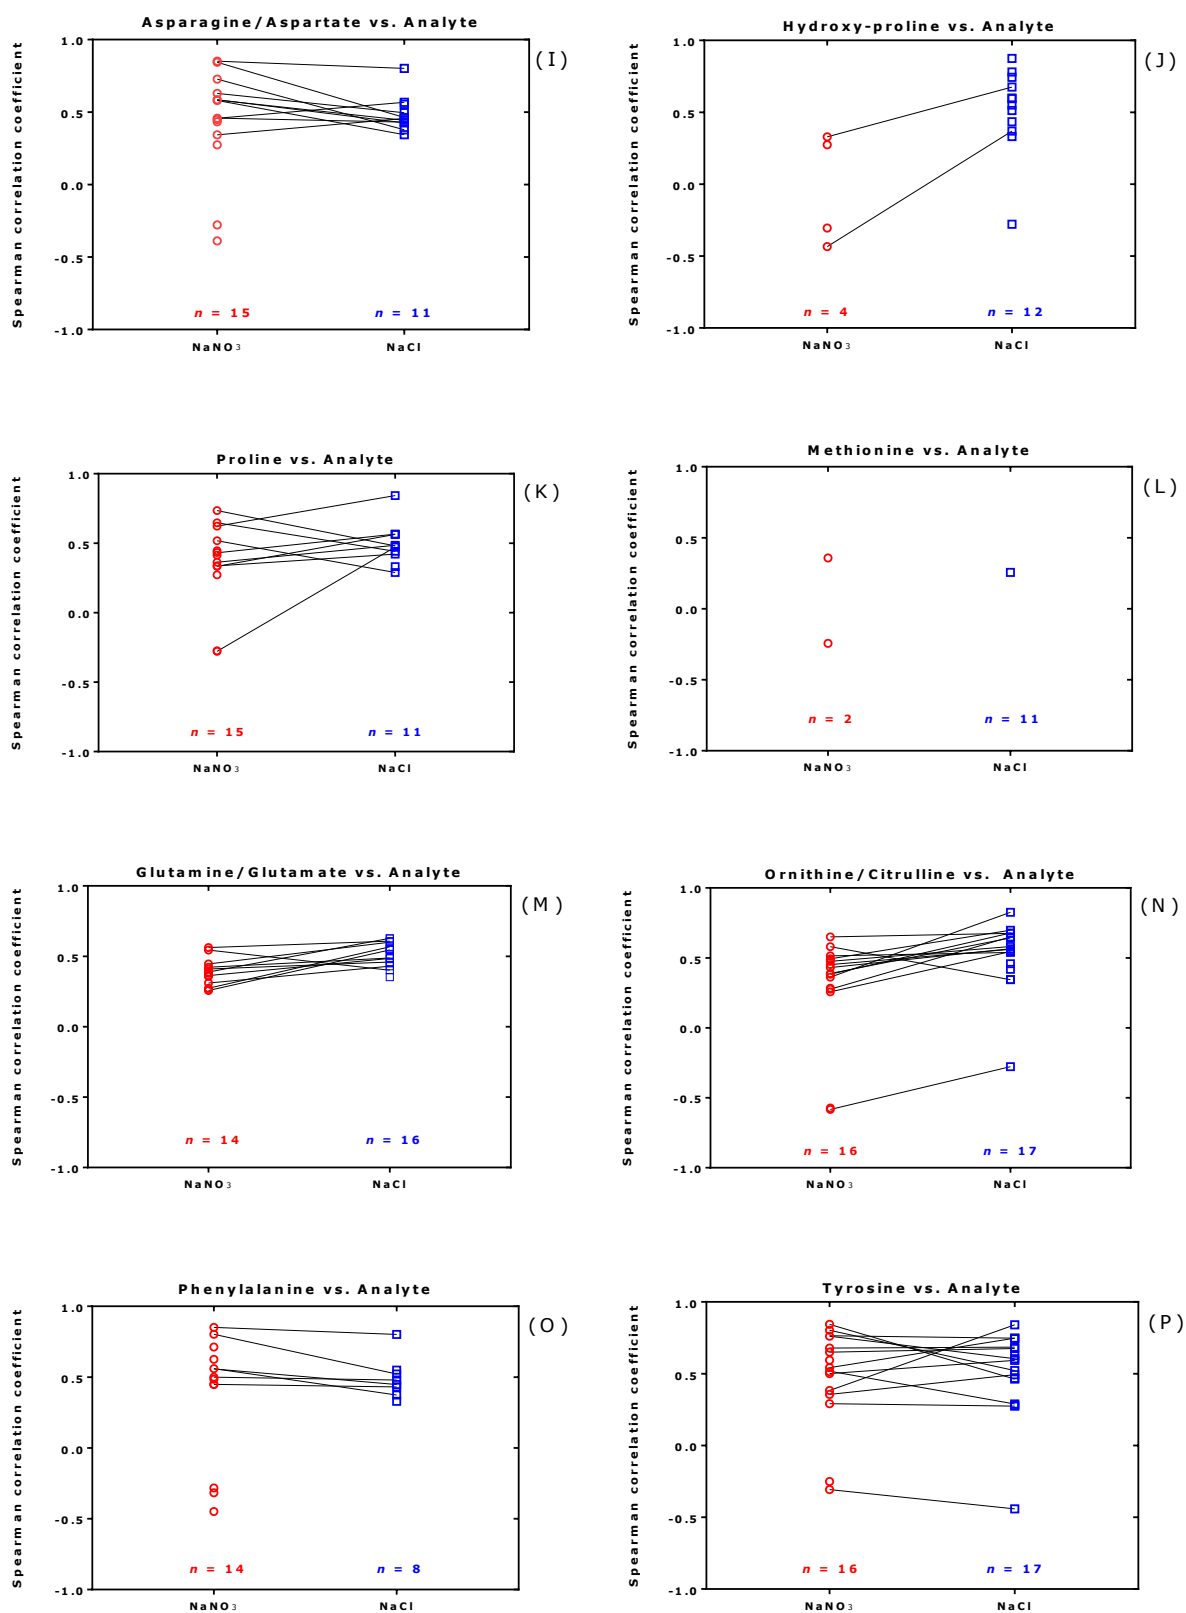

Figure S6 (Panel A to X) continued



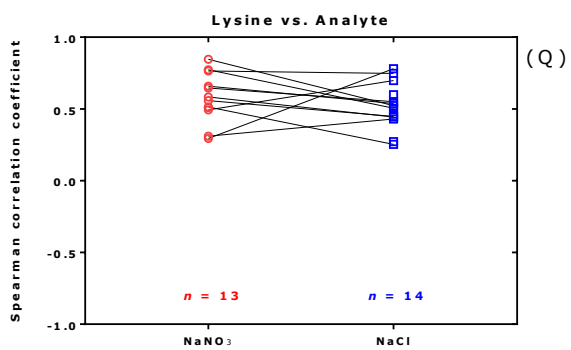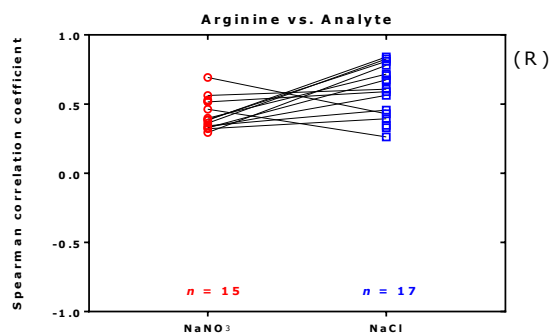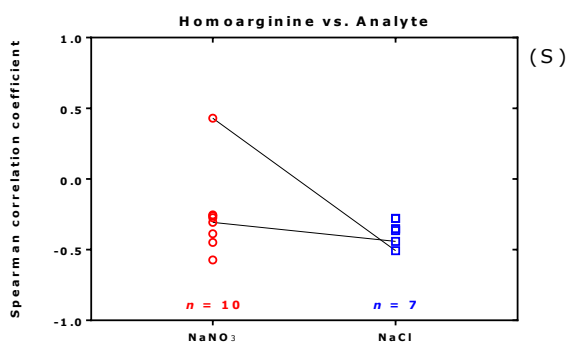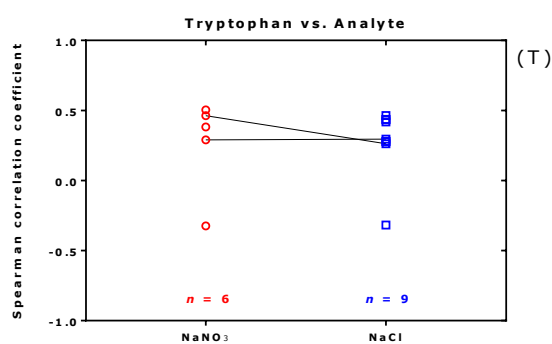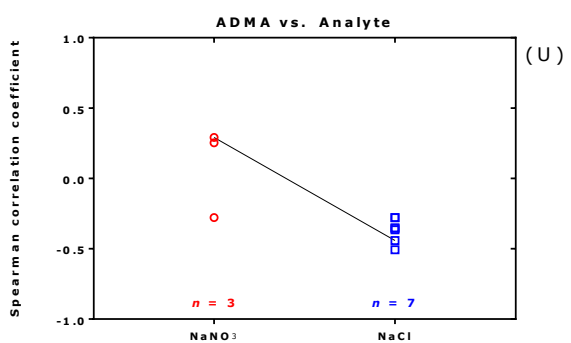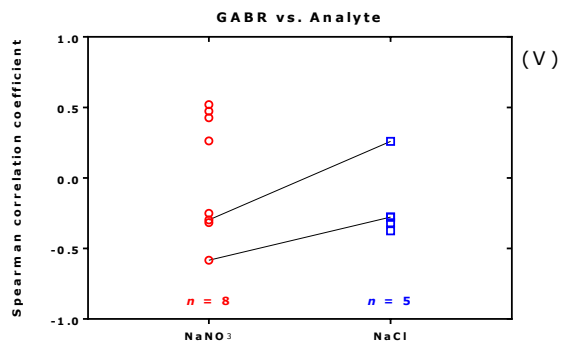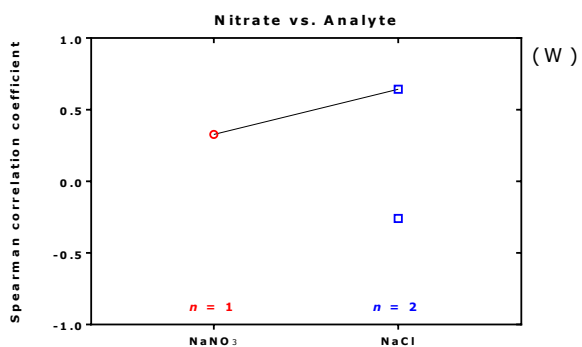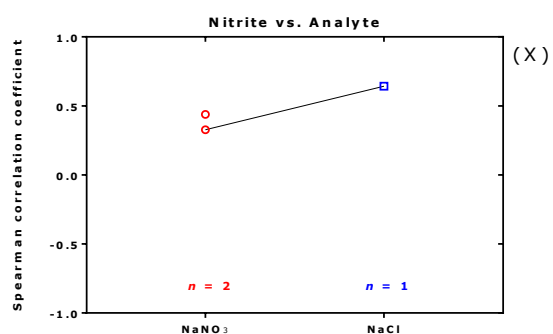

## (B) Multivariate statistical analyses

Multivariate statistical analyses were performed on SAS® OnDemand for Academics and used to describe the relationships among plasma amino acids concentrations, and related parameters such as  $K_{\text{gaa}}$ ,  $K_{\text{harg}}$ , time and kind of treatment (NaCl vs NaNO<sub>3</sub>). Because plasma amino acids concentrations are largely correlated each other, we used both supervised and unsupervised *a posteriori* approaches to reduce the data and identify underlying constructs or patterns that best explain data according to supplementation. In the analysis, we used 25 variables, including amino acids, equilibrium constants and time.. Multivariate statistical analyses were performed on SAS® OnDemand for Academics. These analyses are described in detail in the Supplement to this work

### 1) Unsupervised PCA

Principal Component Analysis (PCA) was applied on the 25 standardized variables. Three components were extracted, explaining 57% of the total variance (Figure S7).

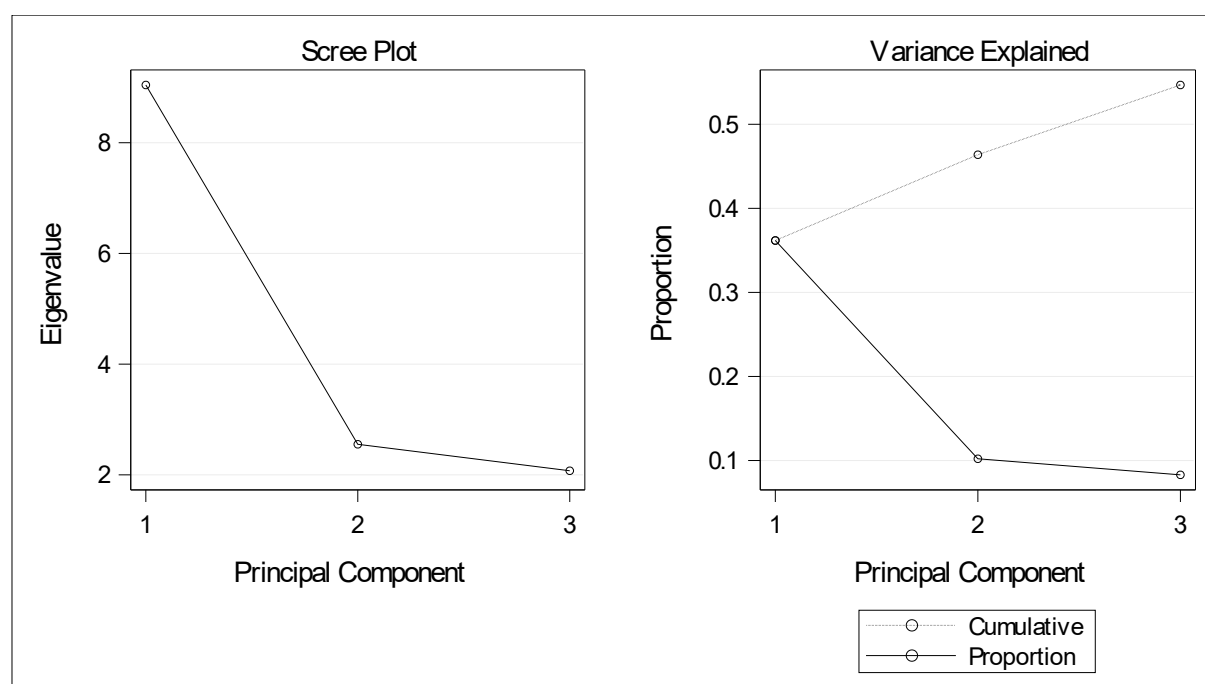

Figure S7. Scree plots of Eigenvalues and proportion of variance explained by the top three principal components.

Orthogonal rotation of the components was undertaken using the varimax procedure. The variable loadings of the components are shown in Table S3.

Table S3. Correlations of variables with the top three Eigenvectors

| Variables                           | Eigenvectors |           |           |
|-------------------------------------|--------------|-----------|-----------|
|                                     | V1           | V2        | V3        |
| Time (min)                          | -0.003464    | 0.114890  | 0.129442  |
| Ala                                 | 0.146228     | -0.004953 | 0.325103  |
| Thr                                 | 0.257117     | 0.125367  | -0.023161 |
| Gly                                 | 0.210201     | -0.081152 | 0.151410  |
| Val                                 | 0.255698     | -0.193970 | -0.012837 |
| Ser                                 | 0.241854     | 0.146185  | 0.121267  |
| Sarcosine                           | 0.208889     | -0.039877 | 0.064527  |
| Leu/Ile                             | 0.283600     | -0.155690 | 0.066761  |
| GAA                                 | 0.113697     | 0.512763  | 0.077623  |
| Asp/Asn                             | 0.246950     | -0.233925 | -0.091398 |
| OH-Pro                              | 0.156428     | -0.148923 | -0.042922 |
| Pro                                 | 0.208688     | -0.113759 | 0.193511  |
| Met                                 | 0.031089     | 0.235720  | 0.172185  |
| Glu/Gln                             | 0.179184     | 0.114400  | 0.427445  |
| Orn/Cit                             | 0.228001     | 0.029496  | 0.088742  |
| Phe                                 | 0.221147     | -0.136237 | -0.226708 |
| Tyr                                 | 0.297981     | -0.005661 | -0.165702 |
| Lys                                 | 0.255571     | 0.012233  | -0.079437 |
| Arg                                 | 0.264239     | -0.042029 | 0.150376  |
| hArg                                | -0.129028    | -0.060647 | 0.416006  |
| Trp                                 | 0.113324     | 0.144607  | -0.011981 |
| ADMA                                | 0.089594     | 0.147920  | 0.191116  |
| K <sub>gaa</sub>                    | -0.021955    | 0.482388  | -0.009537 |
| K <sub>harg</sub>                   | -0.234933    | -0.053022 | 0.313777  |
| K <sub>gaa</sub> /K <sub>harg</sub> | 0.165389     | 0.393541  | -0.375029 |

## 2) Supervised PLS

Partial least squares (PLS) regression was used with 25 variables as response factor and treatment as categorical predictor using NIPALS algorithm. We rather focused on finding a

few variables that contribute most to separating the data between the two-predictor modalities.

## PCA

The C1/C3 factorial plan best discriminates the effect of  $\text{NaNO}_3$  vs  $\text{NaCl}$ . Five variables are well represented on this picture and suggest that  $\text{NaNO}_3$  supplementation results in higher plasma hArg and a higher  $K_{\text{harg}}$  equilibrium constant, while  $\text{NaCl}$  supplementation results in higher plasma aromatic amino acids and in a higher  $K_{\text{gaa}}/K_{\text{harg}}$  ratio. See [Figure 7](#) in the main text.

## PLS

In the model, 100% of the response variation is explained by just one factor but only explains 4.7% of the predictor variation. The coefficients for predicting the responses were used as a tool for finding a few variables with the biggest coefficient that contribute most to separating the data between the two modalities of the treatment ( $\text{NaNO}_3$  and  $\text{NaCl}$ ). Glu+Gln, hArg plasma concentrations and  $K_{\text{gaa}}$  and  $K_{\text{harg}}$  are the best single contributor to predict  $\text{NaNO}_3$  treatment, whereas sarcosine, tryptophan, phenylalanine, and tyrosine plasma concentrations and the  $K_{\text{gaa}}/K_{\text{harg}}$  ratio better contribute to predict  $\text{NaCl}$  treatment ([Figure S8](#), [Table S3](#)).

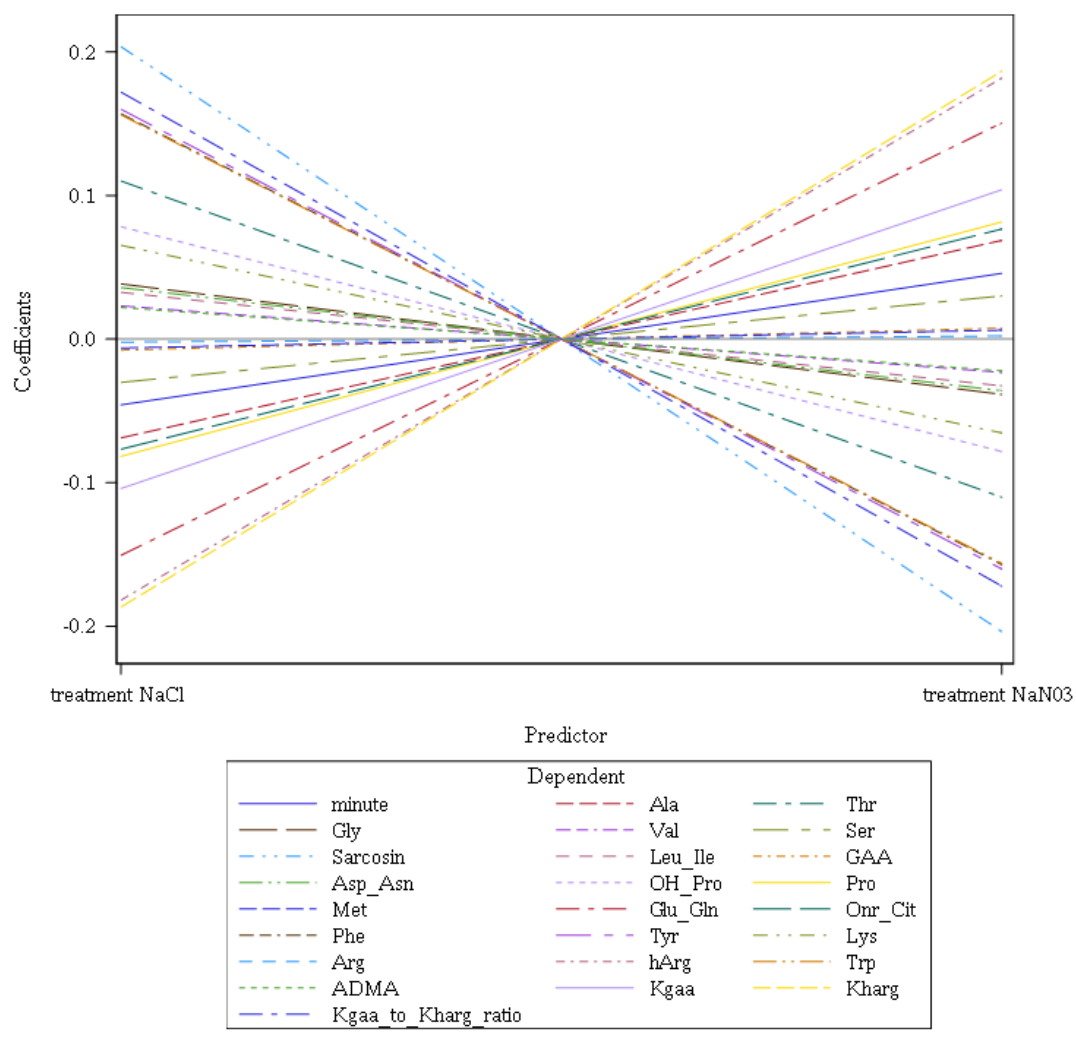

Figure S8: Profiles of centered and scaled parameter estimates according to treatment modality.

[Table S4](#). Coefficient estimates of the final predictive model for the responses variables (centered and scaled data). Intercept value is zero (not shown)

| <b>Parameter Estimates for Centered and Scaled Data</b> | <b>Variable</b>                         | <b>NaNO<sub>3</sub> vs NaCl</b> |
|---------------------------------------------------------|-----------------------------------------|---------------------------------|
|                                                         | Time (minute)                           | +0.05                           |
|                                                         | Ala                                     | +0.07                           |
|                                                         | Thr                                     | -0.11                           |
|                                                         | Gly                                     | -0.04                           |
|                                                         | Val                                     | -0.02                           |
|                                                         | Ser                                     | +0.03                           |
|                                                         | <b>Sarcosine</b>                        | <b>-0.20</b>                    |
|                                                         | Leu/Ile                                 | -0.03                           |
|                                                         | GAA                                     | +0.01                           |
|                                                         | Asp/Asn                                 | -0.04                           |
|                                                         | OH-Pro                                  | -0.08                           |
|                                                         | Pro                                     | +0.08                           |
|                                                         | Met                                     | +0.01                           |
|                                                         | <b>Glu/Gln</b>                          | <b>+0.15</b>                    |
|                                                         | Orn/Cit                                 | +0.08                           |
|                                                         | <b>Phe</b>                              | <b>-0.16</b>                    |
|                                                         | <b>Tyr</b>                              | <b>-0.16</b>                    |
|                                                         | Lys                                     | -0.07                           |
|                                                         | Arg                                     | +0.00                           |
|                                                         | <b>hArg</b>                             | <b>+0.18</b>                    |
|                                                         | <b>Trp</b>                              | <b>-0.16</b>                    |
|                                                         | ADMA                                    | -0.02                           |
|                                                         | <b>K<sub>gaa</sub></b>                  | <b>+0.10</b>                    |
|                                                         | <b>K<sub>harg</sub></b>                 | <b>+0.19</b>                    |
|                                                         | <b>K<sub>gaa</sub>/K<sub>harg</sub></b> | <b>-0.17</b>                    |
